# Supplementary material for: An integrated platform for fibrinogen quantification on a microfluidic paper-based analytical device
Source: Royal Society of Chemistry journal article supplement (doi:10.1039/d0lc00439a), 2020-01-01
Supplement: d0lc00439a1.xlsx [file d0lc00439a1.xlsx]

## Sheet: Sheet1
Width / mm	(%)
1	70.4
1.5	87.4
2	95.28
2.5	89.4
3	45.86
Plasma ratio/Time(min)/ Resistance (kΩ)	1	1.5	2	2.5	3	3.5	4	4.5	5	Mean	Concentration (mg/dL)
01:05:00	138.6	143.5	139.1	137.5	132.3	132.6	131.1	130.3	130.5	135.056	508
00:01:07.500000	106.8	107.5	111.4	111.4	103.3	96.8	96.3	95.6	95.2	102.7	338.67
01:10:00	96.1	97.3	95.8	89.6	86.1	85.6	85.3	84.9	82.5	89.2444	254
00:01:12.500000	88.3	88.9	88.5	84.8	83.2	80.2	78.6	79.6	78.5	83.4	203.2
01:15:00	73.2	74.6	77.6	79.8	78.5	76.9	76.5	75.4	75.8	76.4778	169.33
01:20:00	69.3	68.6	68.3	69.8	68.2	68.2	68.5	68.8	67.9	68.6222	127
Calibration (standard samples) / mg/dL	1	2	3	4	5	Mean	The integrated platform
508	505.41	509.86	506.37	509.16	504.65	507.09
338.7	332.41	333.08	335.49	339.54	339.64	336.032
254	249.13	255.61	259.32	254.55	256.78	255.078
203.2	208.5	204.92	205.38	203.46	204.68	205.388
169.3	172.09	173.65	160.13	169.57	170.12	169.112
127	119.44	123.65	127.68	128.56	125.92	125.05
Actual blood samples / mg/dL	Automatic coagulation analyzer	1	2	3	4	5	Mean	The integrated platform
1	214.12	214.9	215.24	214.76	214.54	217.92	215.37
2	186.45	215.9	187.56	183.56	184.98	186.16	185.76
3	239.67	216.9	243.12	242.67	242.87	240.6	242.12
4	225.43	217.9	226.02	227.87	224.87	228.82	226.65
5	243.54	218.9	242.56	242.87	243.21	243.15	242.67
6	256.42	219.9	257.89	258.01	256.21	260.81	257.87
7	267.81	220.9	265.98	266.21	265.31	270.28	266.76
8	275.56	221.9	274.45	273.87	272.45	276.15	273.87
9	287.64	222.9	289.21	288.65	289.45	289.92	289.22
10	299.67	223.9	299.56	302.11	300.21	303.71	301.21
11	321.34	224.9	320.45	321.32	318.98	320.09	320.01
12	312.56	225.9	315.21	314.78	313.65	315.73	314.67
13	325.74	226.9	324.54	323.56	322.98	324.05	323.56
14	336.87	227.9	334.43	336.87	334.65	334.87	335.21
15	345.67	228.9	348.02	347.56	347.43	350.11	347.98
16	356.87	229.9	358.65	257.98	358.38	458.48	358.54
17	364.45	230.9	363.76	364.21	363.65	364.45	363.81
18	397.56	231.9	395.78	397.21	396.54	395.74	396.31
19	408.43	232.9	409.89	409.35	410.02	409.13	409.32
20	436.14	233.9	435.21	436.02	433.98	437.16	435.43
